# Supplementary material for: Population genetics of the blueberry gall midge, Dasineura oxycoccana (Diptera: Cecidomyiidae), on blueberry and cranberry, with testing invasion scenarios
Source: Research Square preprint supplement (doi:10.21203/rs.3.rs-1340690/v1), 2022-04-12
Supplement: Supplementary file 1 [file 354304c483402b4616580989.docx]

**Population genetics of the blueberry gall midge *Dasineura oxycoccana* (Diptera: Cecidomyiidae) on blueberry and cranberry, with testing the invasion scenarios**

**Hyojoong Kim1,*, Cesar Rodriguez-Saona2,*, Heung-Sik Lee3**

1 *Department of Biological Science, Kunsan National University, Gunsan, Jeonbuk 54150, Rep. of Korea*

2 *Department of Entomology, P.E. Marucci Center, Rutgers University, Chatsworth, NJ 08019, USA*

3 *Animal & Plant Quarantine Agency, Gimcheon, Gyeongbuk 39660, Rep. of Korea*

*Co-correspondence: hkim@kunsan.ac.kr (H.K.); crodriguez@aesop.rutgers.edu (C.R-S)

**Supplementary material 1: Figs. S1-S4**


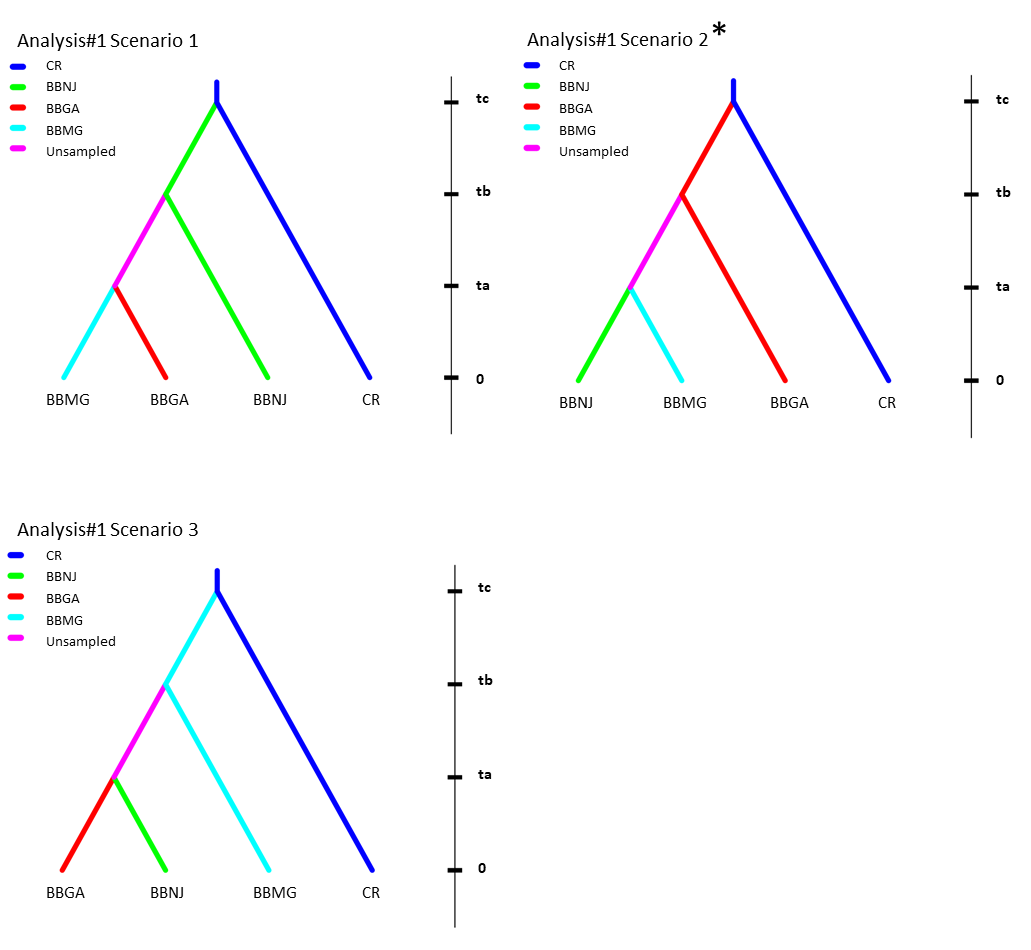


**Fig. S1.** The simulated DIYABC historical scenarios by analysis#1. Three analysis scenarios to identify ancestral groups and to determine the divergence order of each group. Each branch’s color represents a specific group, red: BBGA, BGM group from blueberry in Georgia, green: BBNJ, BGM group from blueberry in New Jersey, blue: CR, pooled CTW group from cranberry. Information of each scenario is explained in the main text


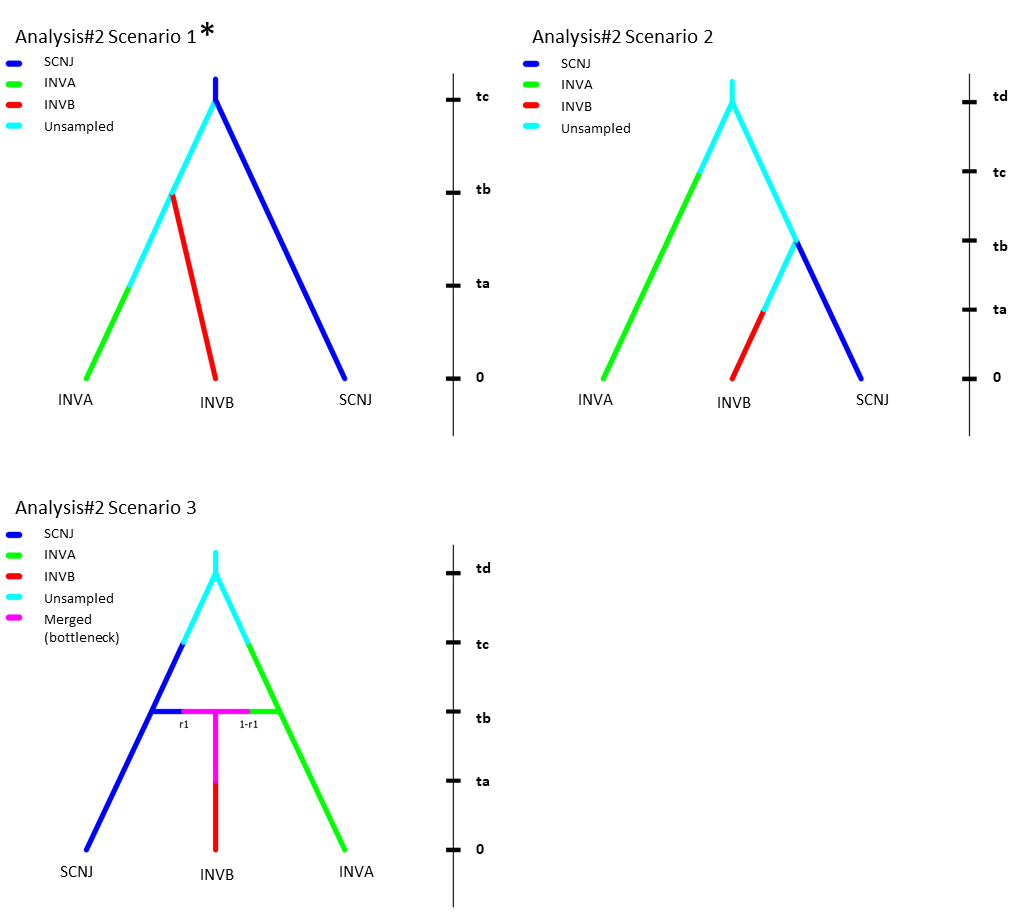


**Fig. S2.** The simulated DIYABC historical scenarios by analysis#2. Three analysis scenarios to identify ancestral groups and to determine the divergence order of each group. Each branch’s color represents a specific group, blue: SCNJ, one source blueberry-associated group, green: INVA, invasive blueberry-associated group A, red: INVB, invasive blueberry-associated group B. Information of each scenario is explained in the main text

**
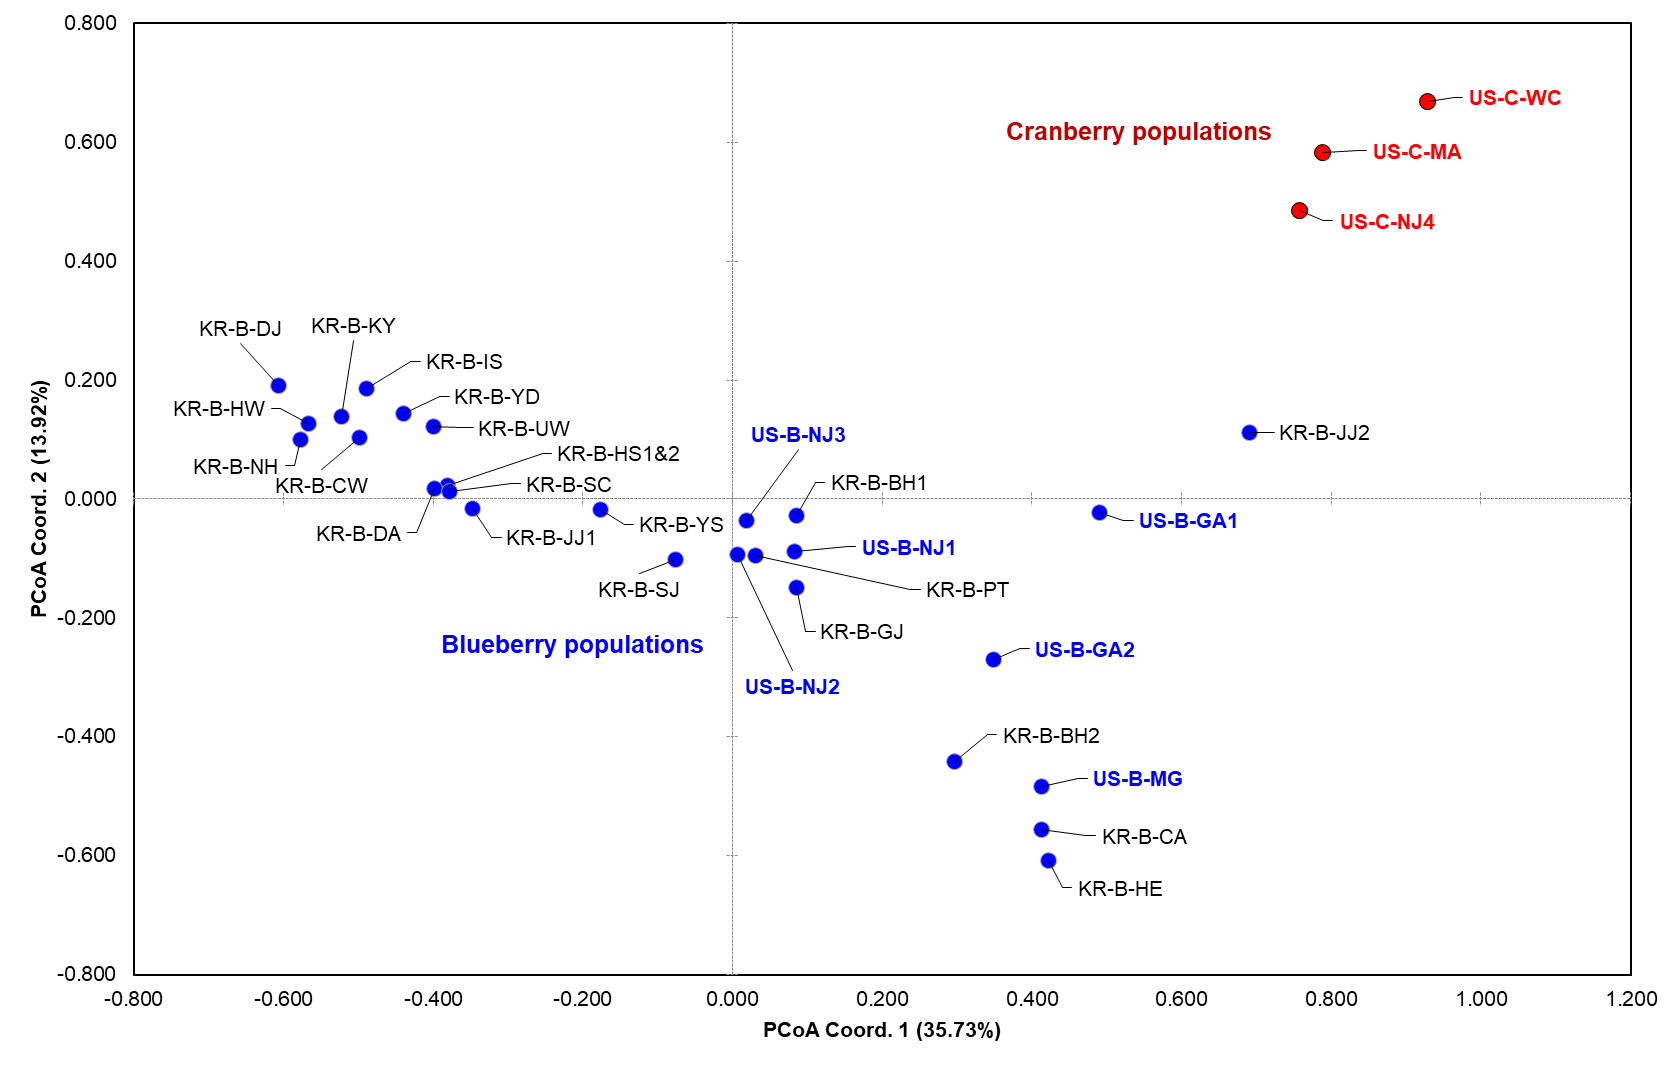
**

**Fig. S3.** Principal Coordinates Analysis (PCoA) plotted by microsatellite data from 31 populations of *Dasineura oxycoccana* from cranberry and blueberry by GENALEX. The X-axis is coordinate 1 ranging from -0.80 to 1.20 and the Y-axis coordinate 2 from -0.80 to 0.80. Red circle means cranberry population, while blue blueberry one.

**(a)**

**
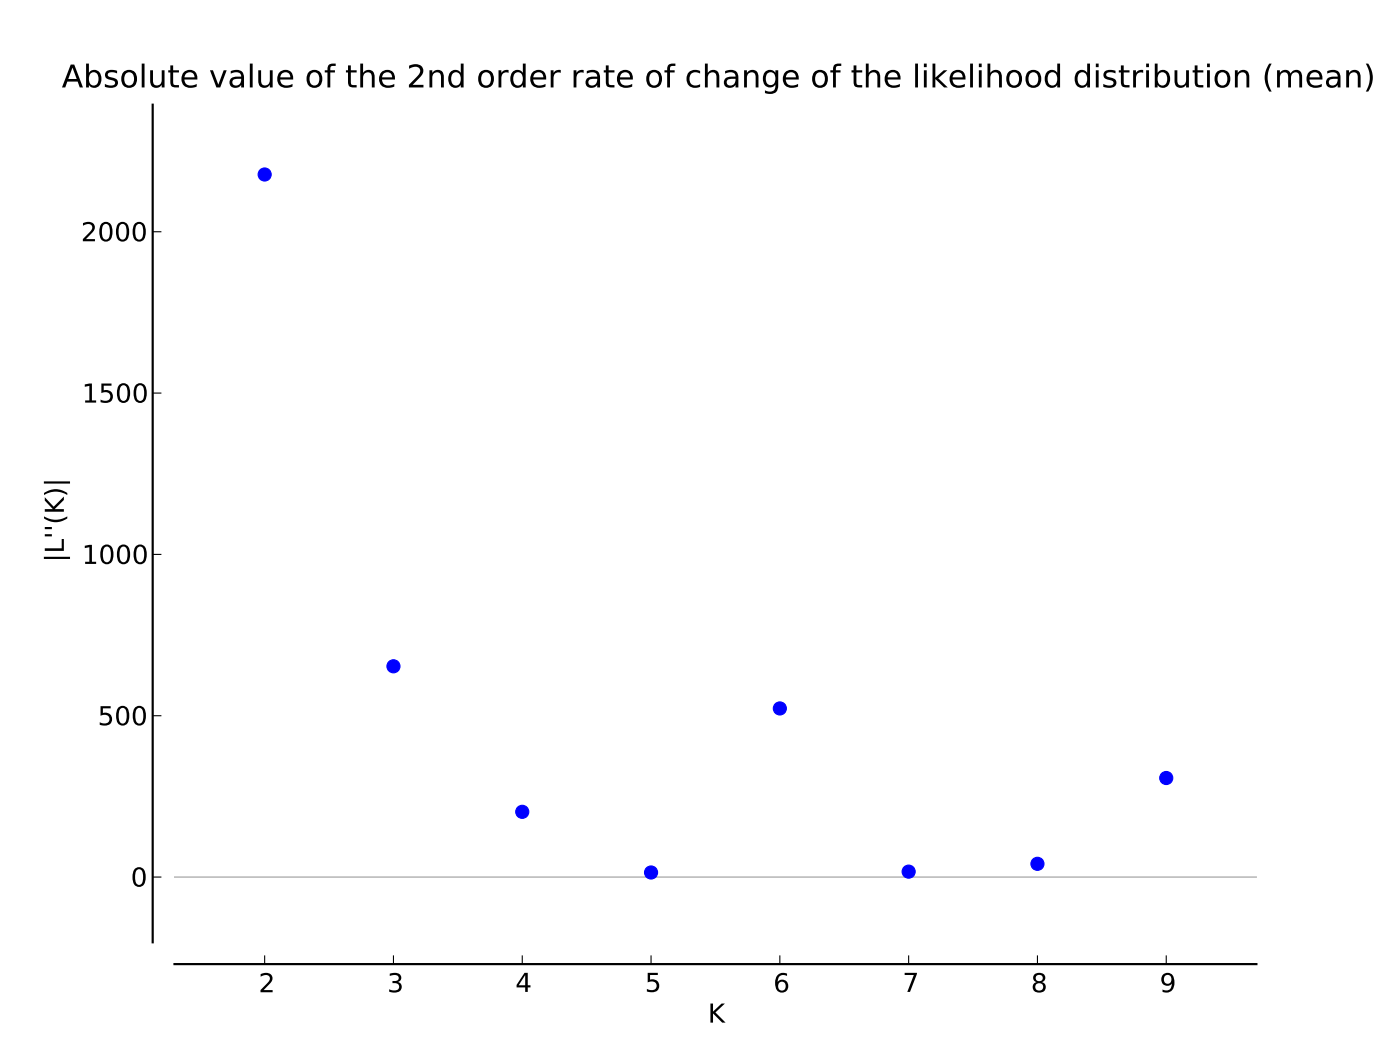
**

**(b)**

**
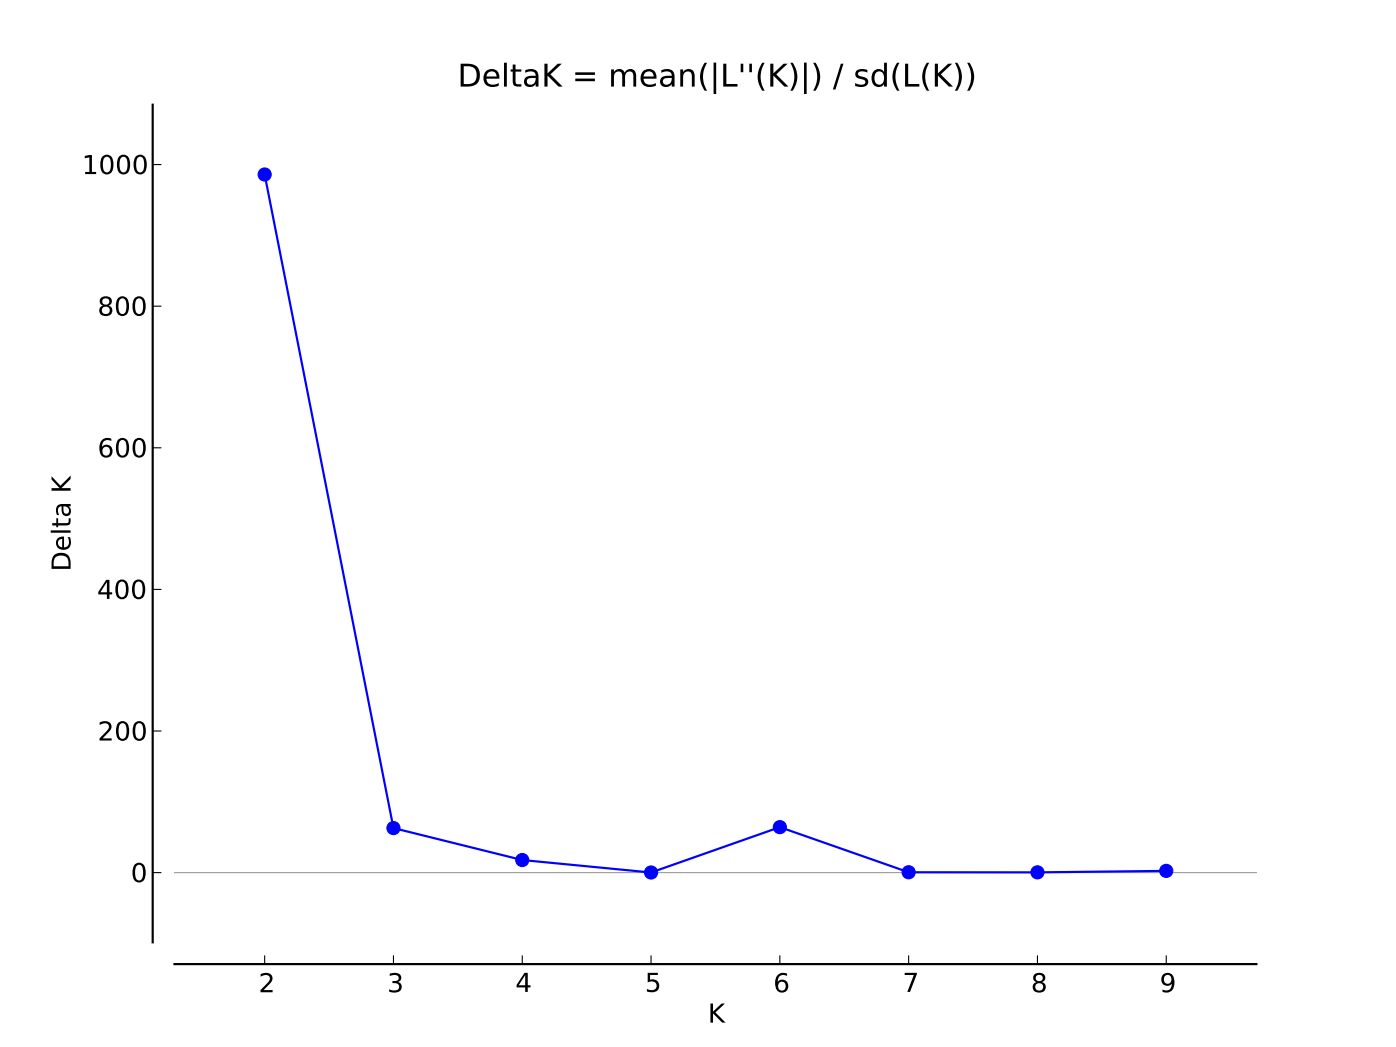
**

**Fig. S4.** Results of STRUCTURE Harvester (approximate numbers). (a) Graph for the absolute value of the second order rate of change of the likelihood distribution (mean) calculated with the number of clusters (*K*) for observation of population group of *Bactrocera dorsalis*, demonstrated by the STRUCTURE Harvester (Earl 2012). Delta *K* values calculated by Evanno et al. (2005) method detecting *K* = 2 groups. (b) Mean of probabilities lnP(*K*) and their standard deviation of the posterior probability
